# Supplementary material for: Antimicrobial resistance and prevalence of tetracycline resistance genes in Escherichia coli isolated from lesions of colibacillosis in broiler chickens in Sistan, Iran
Source: BMC Vet Res. 2020 Aug 3;16:267. doi: 10.1186/s12917-020-02488-z (PMC7397602; doi:10.1186/s12917-020-02488-z)
Supplement: Supplementary file 1 — Additional file 1. Fig. 1 The original full-length gel image of the amplified products is presented. [file 12917_2020_2488_MOESM1_ESM.xlsx]

## Sheet: Sheet1
No.	GM10	LS	XM30	CP5	SXT	TE30	tetA	tetB	tetC	tetD		Abreviations
1	R	I	I	R	R	R	P	P	N	N		Gentamycin (GM10)
2	S	R	R	R	R	R	P	N	N	N		Lincospectin (LS)
3	R	I	S	R	R	R	P	P	P	N		Cefuroxime (XM30)
4	R	S	S	R	R	R	P	N	N	N
5	S	R	S	R	R	R	P	N	P	N		Ciprofloxacin (CP5)
6	R	R	I	R	R	R	P	N	P	N		Co-trimoxazole (SXT)
7	R	S	S	R	R	R	P	N	N	N		Tetracycline (TE30)
8	R	R	S	R	R	R	P	P	P	N
9	R	S	S	R	R	R	P	P	N	N
10	R	S	I	R	R	R	P	N	N	N
11	S	R	I	R	R	R	P	N	N	N		P=positive
12	R	R	R	R	R	R	P	N	N	N		N=negative
13	S	S	S	R	R	R	P	P	N	N
14	S	S	I	R	S	R	P	N	N	N		S=susceptible
15	R	R	S	R	R	R	P	N	N	N		I=inermediate
16	S	R	I	R	R	R	P	P	N	N		R=resistant
17	S	S	R	R	R	R	P	N	N	N
18	S	R	R	R	R	R	P	N	N	N
19	S	R	R	R	R	R	P	P	N	N
20	S	R	R	R	R	R	P	N	P	N
21	S	S	I	R	S	R	P	N	N	N
22	S	R	R	R	R	R	N	P	N	P
23	S	R	R	R	R	R	P	P	P	N
24	S	R	I	R	R	R	P	P	N	N
25	S	R	I	R	R	R	P	P	N	N
26	S	R	I	S	R	R	P	P	N	N
27	R	R	I	R	R	R	P	N	P	N
28	R	R	I	R	R	R	P	N	P	N
29	S	S	I	R	R	R	P	P	N	N
30	S	R	I	R	R	R	P	N	N	N
31	S	R	R	R	R	R	P	N	N	N
32	S	I	R	R	R	R	P	N	P	N
33	S	S	R	I	S	R	P	N	N	N
34	S	R	R	R	R	R	P	N	N	N
35	S	S	R	R	R	I	P	N	N	P
36	S	S	R	R	R	R	P	P	N	N
37	S	S	I	R	R	R	P	N	N	N
38	S	S	I	R	R	R	P	N	N	N
39	S	S	R	R	R	R	P	N	P	N
40	S	S	R	R	R	R	P	N	N	N
41	S	R	S	R	R	R	P	N	N	N
42	S	S	I	S	S	R	P	N	P	N
43	S	S	R	R	R	R	P	P	P	N
44	S	S	R	R	R	R	P	N	P	N
45	S	S	R	R	R	R	P	N	N	N
46	S	R	I	R	R	R	P	P	N	P
47	S	I	S	S	S	R	P	N	N	N
48	S	S	R	S	S	R	P	N	N	N
49	S	S	R	S	S	R	P	N	P	N
50	S	R	R	S	R	R	P	N	P	N
51	S	I	R	R	R	S	P	N	N	P
52	S	S	R	R	R	R	P	P	P	N
53	S	R	I	R	R	R	P	N	N	N
54	S	R	R	R	R	R	P	P	P	P
55	S	R	I	R	R	R	P	P	P	N
56	S	R	S	R	S	S	N	P	N	N
57	S	R	R	R	R	R	P	P	P	N
58	R	R	I	R	R	R	P	N	N	N
59	S	R	R	R	R	R	P	P	N	N
60	S	R	R	R	R	R	P	P	N	N
